# Supplementary material for: Pt–Co deposited on polyaniline-modified carbon for the electro-reduction of oxygen: the interaction between Pt–Co nanoparticles and polyaniline
Source: Royal Society of Chemistry journal article supplement (doi:10.1039/c7nj00145b), 2017-01-01
Supplement: c7nj00145b1.pdf [file c7nj00145b1.pdf]

Supporting Information for:

## Pt-Co deposited on polyaniline-modified carbon for the electro-reduction of oxygen: The interaction between Pt-Co nanoparticle and polyaniline

Yang Liu,<sup>&</sup> Nanjun Chen,<sup>&</sup> Fanghui Wang, Yezheng Cai, Hong Zhu\*

State Key Laboratory of Chemical Resource Engineering, Institute of Modern Catalysis,  
Department of Organic Chemistry, School of Science, Beijing University of Chemical Technology,  
Beijing, 100029, P. R. China [Tel:+86-10-64444919](tel:+86-10-64444919);  
E-mail: zhuho128@126.com

### Table of content

**Table S1.** The electrochemical activity of catalysts

**Table S2.** The mass percentage values of Pt on the catalysts

**Fig. S1** Structure of PANI at 500 °C.

**Table S1.** The electrochemical activity of catalysts

| Sample              | Mass percentage of Pt (Pt wt %) | Electrochemical surface area (m <sup>2</sup> /g <sub>Pt</sub> ) | Mass activity (A/mg <sub>Pt</sub> ) | Specific activity (mA/cm <sub>Pt</sub> <sup>2</sup> ) |
|---------------------|---------------------------------|-----------------------------------------------------------------|-------------------------------------|-------------------------------------------------------|
| JM Pt/C             | 20                              | 68                                                              | 0.17                                | 0.25                                                  |
| Pt-Co/C-PANI        | 10                              | 133                                                             | 0.68                                | 0.51                                                  |
| Pt-Co/C-PANI-400 °C | 11                              | 146                                                             | 1.16                                | 0.79                                                  |
| Pt-Co/C-PANI-500 °C | 14                              | 101                                                             | 1.38                                | 1.37                                                  |
| Pt-Co/C-PANI-600 °C | 17                              | 43                                                              | 0.56                                | 1.32                                                  |

**Table S2.** The mass percentage values of Pt on the catalysts

|                                 | Pt-Co/C | Pt-Co/C-PANI | Pt-Co/C- 500 °C | Pt-Co/C-PANI-500 °C |
|---------------------------------|---------|--------------|-----------------|---------------------|
| Mass percentage of Pt (Pt wt %) | 10      | 10           | 11              | 14                  |

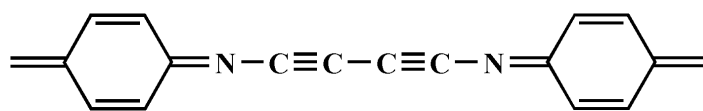

**Fig. S1** Structure of PANI at 500°C.
